# Supplementary material for: Computational investigation into intramolecular hydrogen bonding controlling the isomer formation and pKa of octahedral nickel(ii) proton reduction catalysts
Source: Royal Society of Chemistry journal article supplement (doi:10.1039/d2dt00043a), 2022-01-01
Supplement: d2dt00043a2.pdf [file d2dt00043a2.pdf]

## SUPPORTING INFORMATION

For Dalton Transactions

# Computational investigation into intramolecular hydrogen bonding controlling the isomer formation and $pK_a$ of octahedral nickel (II) proton reduction catalysts

Avik Bhattacharjee, Dayalis S. V. Brown, Carolyn N. Virca, Trent Edward Ethridge, Oreana Mendez Galue, Uyen T. Pham and T.

M. McCormick\*

Portland State University, College of Liberal Arts & Sciences, Department of Chemistry, Post Office Box 751 CHEM, Portland,  
Oregon 97207, USA.

E-mail: t.m.mccormick@pdx.edu

|                                                                                                                                                                                           |        |
|-------------------------------------------------------------------------------------------------------------------------------------------------------------------------------------------|--------|
| <b>Table S1.</b> Single point energies of starting catalysts in different spin states calculated using three different functionals .....                                                  | S2     |
| <b>Table S2.</b> Comparison of single point energies of <i>fac</i> and <i>mer</i> geometries of different ligand modified $[\text{Ni}(\text{PyS})_3]^-$ complexes ...                     | S2     |
| <b>Table S3.</b> Ni-N and Ni-S bond distances ( $\text{\AA}$ ) of the unsubstituted $[\text{Ni}(\text{PyS})_3]^-$ and comparison with the X-ray structure .....                           | S2     |
| <b>Table S4.</b> Ni-N and Ni-S bond distances ( $\text{\AA}$ ) of the starting catalysts ( <b>1</b> ) for unsubstituted and ligand-modified $[\text{Ni}(\text{PyS})_3]^-$ complexes ..... | S3     |
| <b>Figure S1.</b> Topology maps of the computationally modeled protonated intermediates ( <b>1-H</b> ) using B3P86/6-311+G(2df,2pd) in implicit water solvation .....                     | S4-S7  |
| <b>Figure S2.</b> Topology maps of the computationally modeled reduced intermediates ( <b>1-H</b> ) using B3P86/6-311+G(2df,2pd) in implicit acetonitrile solvation .....                 | S8-S11 |
| <b>References</b> .....                                                                                                                                                                   | S11    |

**Table S1.** Single point energies (in a.u.) of the starting catalysts at different spin states (singlet and triplet) using different functionals (B3LYP, B3P86, and M11-L) and 6-311+g(2df,2pd) basis sets in gas phase.

| Single point Energy (a.u.)                            |            |            |            |            |            |            |
|-------------------------------------------------------|------------|------------|------------|------------|------------|------------|
|                                                       | B3LYP      |            | B3P86      |            | M11-L      |            |
|                                                       | Singlet    | Triplet    | Singlet    | Triplet    | Singlet    | Triplet    |
| [Ni(L1) <sub>3</sub> ] <sup>-</sup>                   | -3446.4713 | -3446.4907 | -3450.2148 | -3450.2333 | -3446.3773 | -3446.3936 |
| [Ni(L2) <sub>3</sub> ] <sup>-</sup>                   | -4457.9704 | -4457.9942 | -4463.3839 | -4463.4066 | -4457.5641 | -4457.5832 |
| [Ni(L3) <sub>3</sub> ] <sup>-</sup>                   | -4457.9881 | -4458.0114 | -4463.3998 | -4463.4222 | -4457.5753 | -4457.5940 |
| [Ni(L4) <sub>3</sub> ] <sup>-</sup>                   | -4012.4289 | -4012.4469 | -4017.3341 | -4017.3510 | -4012.1822 | -4012.1963 |
| [Ni(L5) <sub>3</sub> ] <sup>-</sup>                   | -4012.3832 | -4012.4655 | -4017.2892 | -4017.3752 | -4012.1388 | -4012.2104 |
| [Ni(L6) <sub>3</sub> ] <sup>-</sup>                   | -4825.3524 | -4825.3756 | -4830.0155 | -4830.0379 | -4825.1749 | -4825.1942 |
| [Ni(L7) <sub>3</sub> ] <sup>-</sup><br>( <i>fac</i> ) | -3564.4603 | -3564.4799 | -3568.6444 | -3568.6565 | -3564.3476 | -3564.3700 |

**Table S2.** Gas phase single point energies (in a.u.) of the computationally modeled *fac* and *mer*- isomers of five substituted [Ni(PyS)<sub>3</sub>]<sup>-</sup> catalysts in both singlet and triplet spin states.

| Single point Energy (a.u.)           |            |            |            |            |
|--------------------------------------|------------|------------|------------|------------|
|                                      | <i>fac</i> |            | <i>mer</i> |            |
|                                      | Singlet    | Triplet    | Singlet    | Triplet    |
| [Ni(L8) <sub>3</sub> ] <sup>-</sup>  | -4463.3715 | -4463.3855 | -4463.3614 | -4463.3853 |
| [Ni(L9) <sub>3</sub> ] <sup>-</sup>  | -4463.3909 | -4463.4115 | -4463.3956 | -4463.4158 |
| [Ni(L10) <sub>3</sub> ] <sup>-</sup> | -3568.6441 | -3568.6657 | -3568.6501 | -3568.6696 |
| [Ni(L11) <sub>3</sub> ] <sup>-</sup> | -3568.6362 | -3568.6554 | -3568.6424 | -3568.6601 |
| [Ni(L12) <sub>3</sub> ] <sup>-</sup> | -3568.6418 | -3568.6615 | -3568.6479 | -3568.6658 |

**Table S3.** Comparison of the different Ni-N and Ni-S bond lengths (in Å) between the X-ray structure<sup>1</sup> and computationally modeled structures (in gas and water solvated phases) of tris(pyridinethiolato)nickel (II), ([Ni(L1)<sub>3</sub>]<sup>-</sup>).

|       | Bond length (Å)        |       |           | % Error |       |
|-------|------------------------|-------|-----------|---------|-------|
|       | B3P86/6-311+G(2df,2pd) |       | X-ray     | Gas     | Water |
|       | Gas                    | Water |           |         |       |
| Ni-N1 | 2.049                  | 2.055 | 2.034 (4) | 0.74    | 1.03  |
| Ni-N2 | 2.054                  | 2.051 | 2.041 (4) | 0.64    | 0.49  |
| Ni-N3 | 2.079                  | 2.071 | 2.081 (4) | 0.10    | 0.48  |
| Ni-S1 | 2.540                  | 2.534 | 2.541 (1) | 0.04    | 0.28  |
| Ni-S2 | 2.503                  | 2.543 | 2.526 (1) | 0.91    | 0.67  |
| Ni-S3 | 2.537                  | 2.533 | 2.518 (1) | 0.75    | 0.60  |

**Table S4.** Ni-N and Ni-S bond distances (in Å) of the computationally modeled starting catalysts in water solvated phase.

|                                                                    | Ni-N bond length (Å) |                   |                   | Ni-S bond length (Å) |                   |                   |
|--------------------------------------------------------------------|----------------------|-------------------|-------------------|----------------------|-------------------|-------------------|
|                                                                    | Ni-N <sub>C</sub>    | Ni-N <sub>L</sub> | Ni-N <sub>R</sub> | Ni-S <sub>C</sub>    | Ni-S <sub>L</sub> | Ni-S <sub>R</sub> |
| [Ni(L1) <sub>3</sub> ] <sup>-</sup>                                | 2.071                | 2.055             | 2.051             | 2.533                | 2.534             | 2.543             |
| [Ni(L2) <sub>3</sub> ] <sup>-</sup>                                | 2.076                | 2.056             | 2.055             | 2.507                | 2.510             | 2.508             |
| [Ni(L3) <sub>3</sub> ] <sup>-</sup>                                | 2.073                | 2.056             | 2.056             | 2.518                | 2.522             | 2.520             |
| [Ni(L4) <sub>3</sub> ] <sup>-</sup>                                | 2.073                | 2.056             | 2.054             | 2.518                | 2.519             | 2.509             |
| [Ni(L5) <sub>3</sub> ] <sup>-</sup>                                | 2.057                | 2.043             | 2.042             | 2.515                | 2.512             | 2.528             |
| [Ni(L6) <sub>3</sub> ] <sup>-</sup>                                | 2.077                | 2.058             | 2.057             | 2.521                | 2.522             | 2.520             |
| [Ni(L7) <sub>3</sub> ] <sup>-</sup><br>( <i>fac</i> ) <sup>*</sup> | 2.119                | 2.116             | 2.118             | 2.495                | 2.496             | 2.496             |
| [Ni(L8) <sub>3</sub> ] <sup>-</sup><br>( <i>fac</i> ) <sup>*</sup> | 2.193                | 2.204             | 2.211             | 2.427                | 2.427             | 2.427             |
| [Ni(L9) <sub>3</sub> ] <sup>-</sup>                                | 2.072                | 2.057             | 2.054             | 2.521                | 2.520             | 2.522             |
| [Ni(L10) <sub>3</sub> ] <sup>-</sup>                               | 2.073                | 2.056             | 2.051             | 2.531                | 2.526             | 2.545             |
| [Ni(L11) <sub>3</sub> ] <sup>-</sup>                               | 2.071                | 2.055             | 2.051             | 2.540                | 2.538             | 2.548             |
| [Ni(L12) <sub>3</sub> ] <sup>-</sup>                               | 2.069                | 2.053             | 2.049             | 2.540                | 2.539             | 2.554             |

\*For the *fac* complexes [Ni(L7)<sub>3</sub>]<sup>-</sup> and [Ni(L8)<sub>3</sub>]<sup>-</sup>, all three Ni-N bonds are equivalent.

Topology maps of the computationally modeled protonated intermediates (1-H).

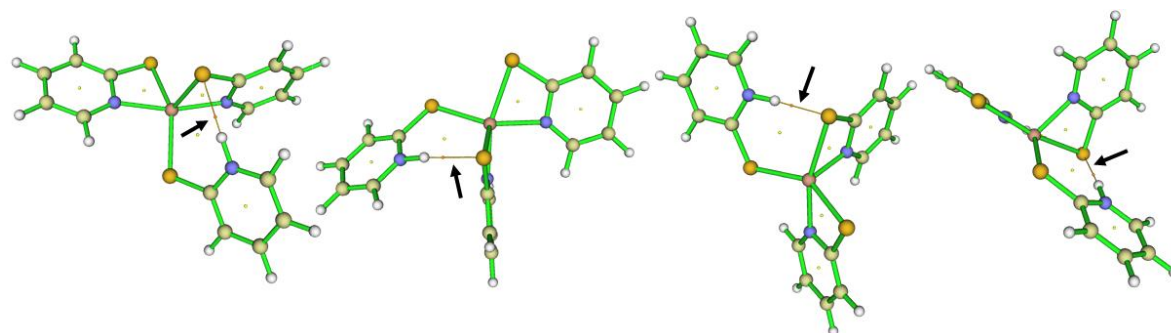

[C] isomer of  $[\text{Ni}(\text{L}1)_3]\text{H}$

$[\text{L}_c]$  isomer of  $[\text{Ni}(\text{L}1)_3]\text{H}$

$[\text{L}_r]$  isomer of  $[\text{Ni}(\text{L}1)_3]\text{H}$

[R] isomer of  $[\text{Ni}(\text{L}1)_3]\text{H}$

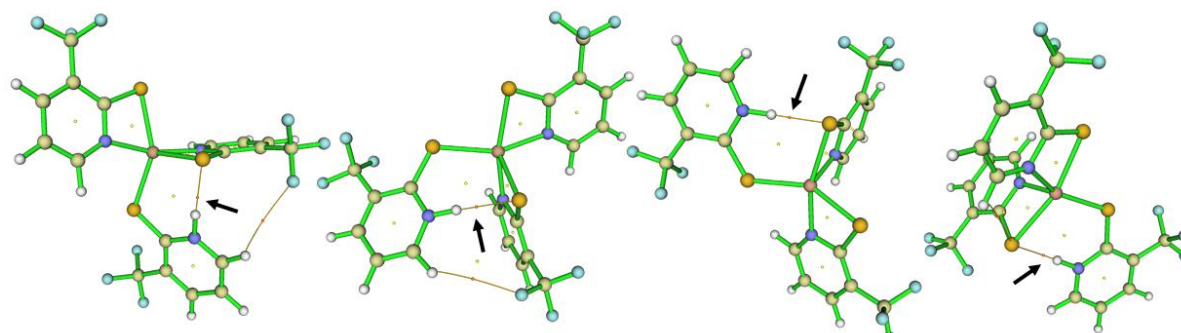

[C] isomer of  $[\text{Ni}(\text{L}2)_3]\text{H}$

$[\text{L}_c]$  isomer of  $[\text{Ni}(\text{L}2)_3]\text{H}$

$[\text{L}_r]$  isomer of  $[\text{Ni}(\text{L}2)_3]\text{H}$

[R] isomer of  $[\text{Ni}(\text{L}2)_3]\text{H}$

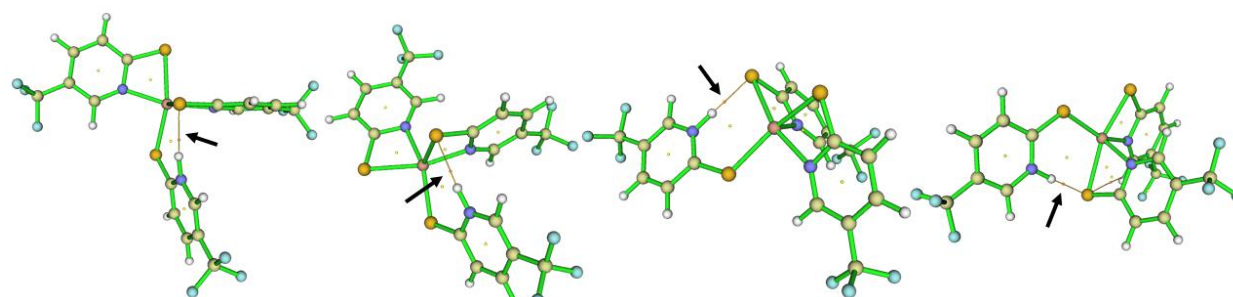

[C] isomer of  $[\text{Ni}(\text{L}3)_3]\text{H}$

$[\text{L}_c]$  isomer of  $[\text{Ni}(\text{L}3)_3]\text{H}$

$[\text{L}_r]$  isomer of  $[\text{Ni}(\text{L}3)_3]\text{H}$

[R] isomer of  $[\text{Ni}(\text{L}3)_3]\text{H}$

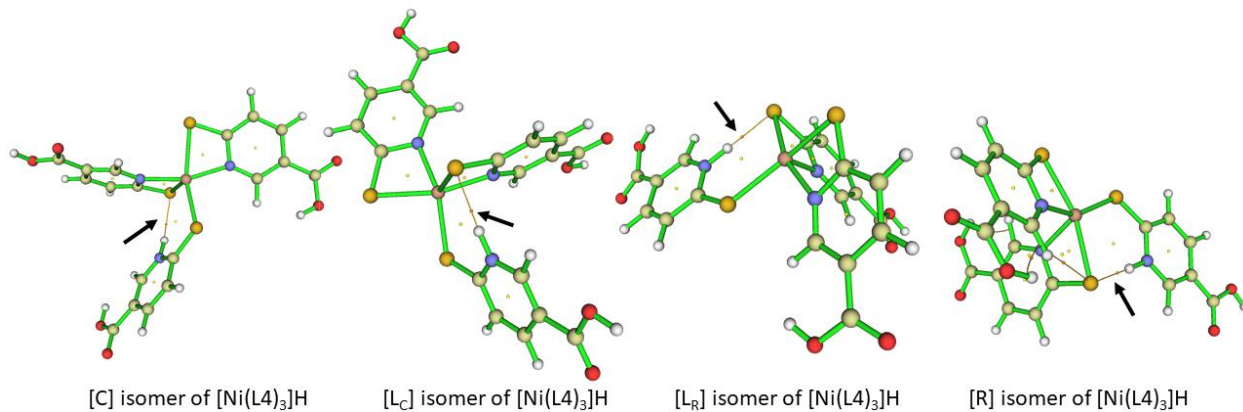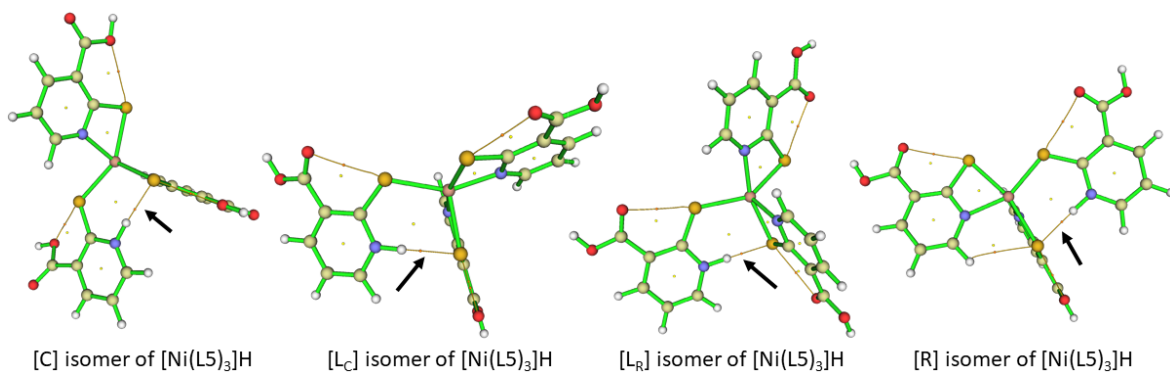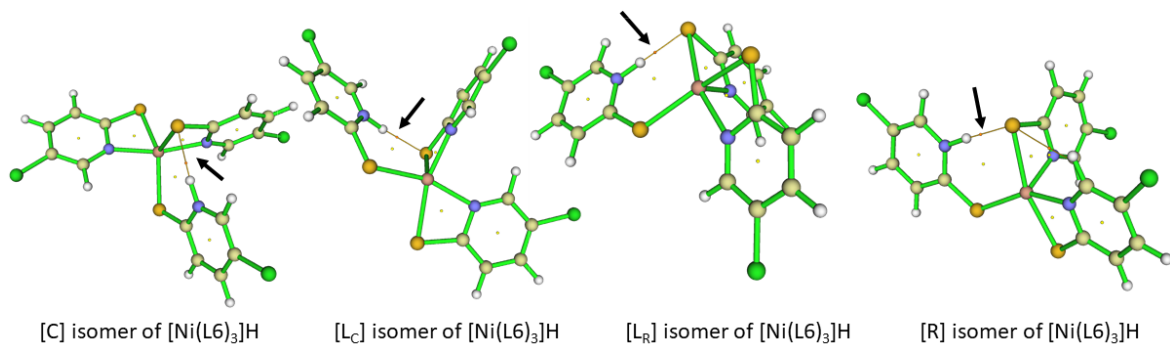

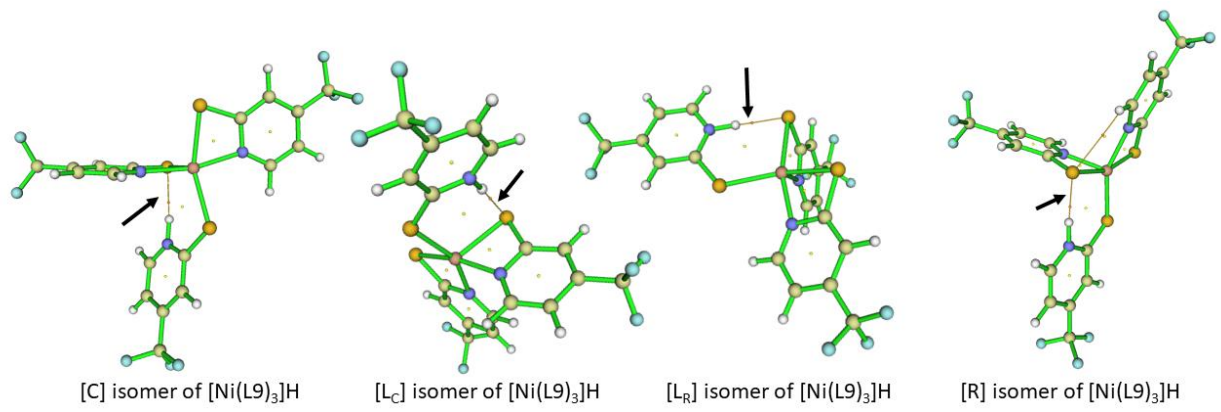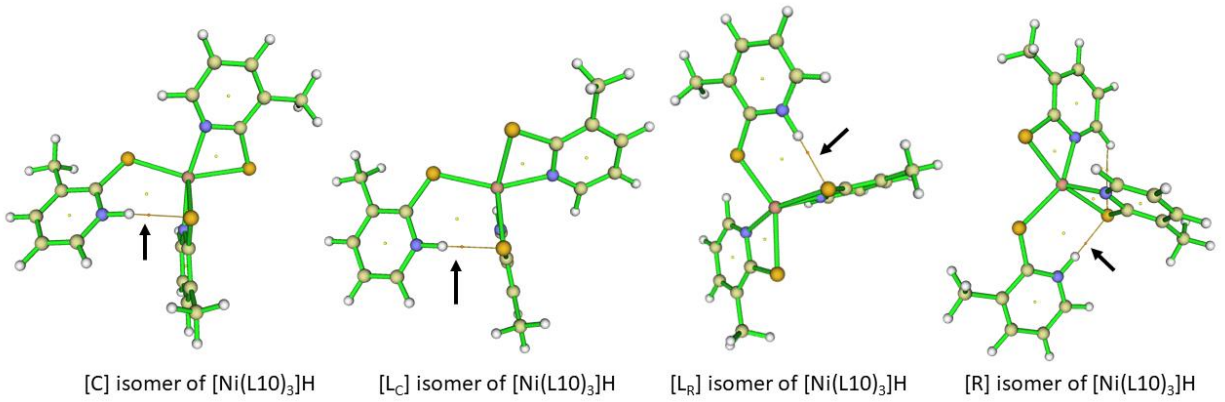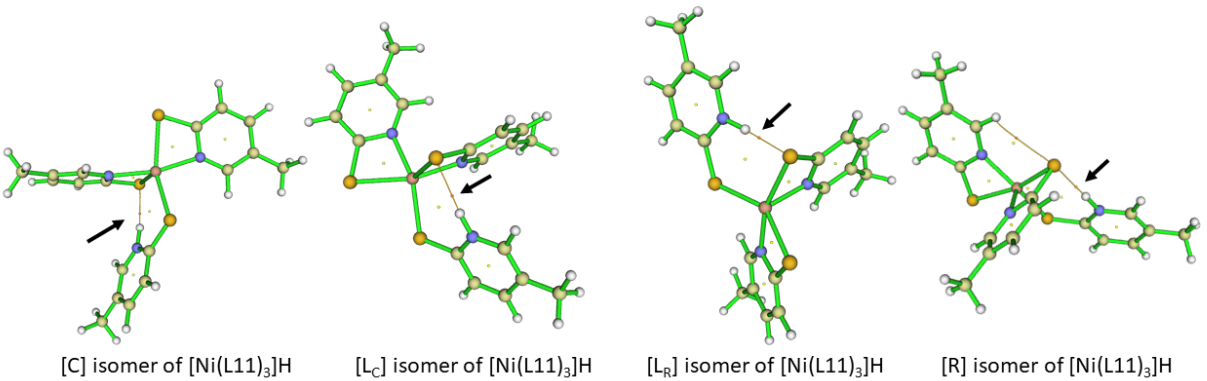

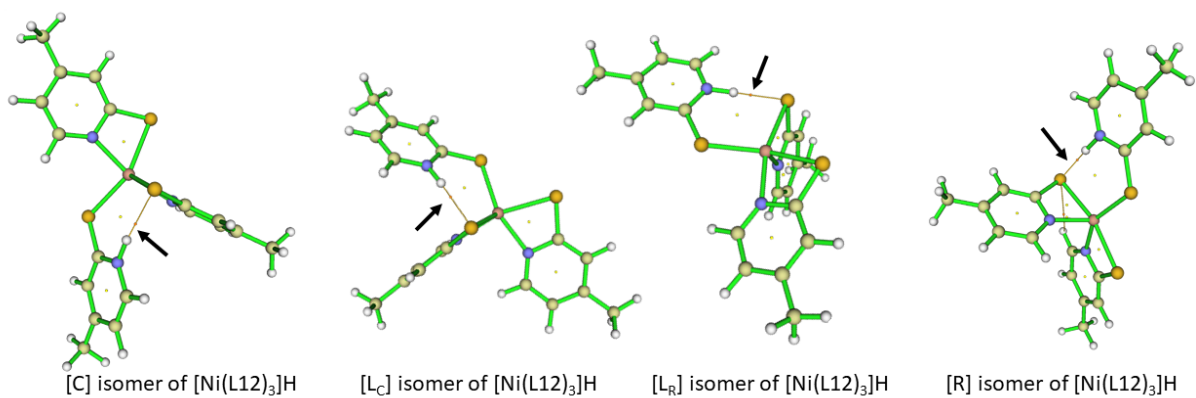

**Figure S1.** Topology maps of the computationally modeled protonated intermediates (**1-H**) represented using ball-stick drawing method. Blue, White, Light Yellow, Dark Yellow, Pink, Indigo, Red and Green balls represent N, H, C, S, Ni, F, O and Cl atoms respectively. Yellow lines are the bond paths. Black arrows point toward the intra-molecular hydrogen bonding interaction stabilizing the structure.

Topology maps of the computationally modeled reduced intermediates (1-H).

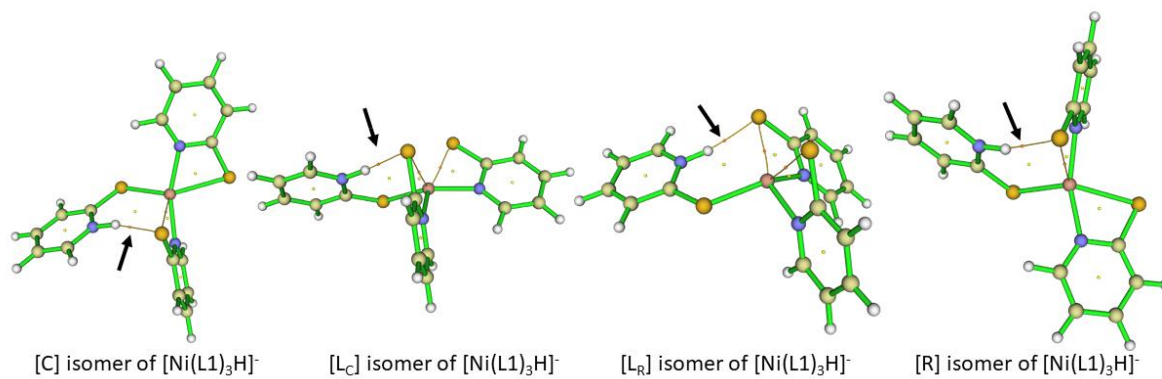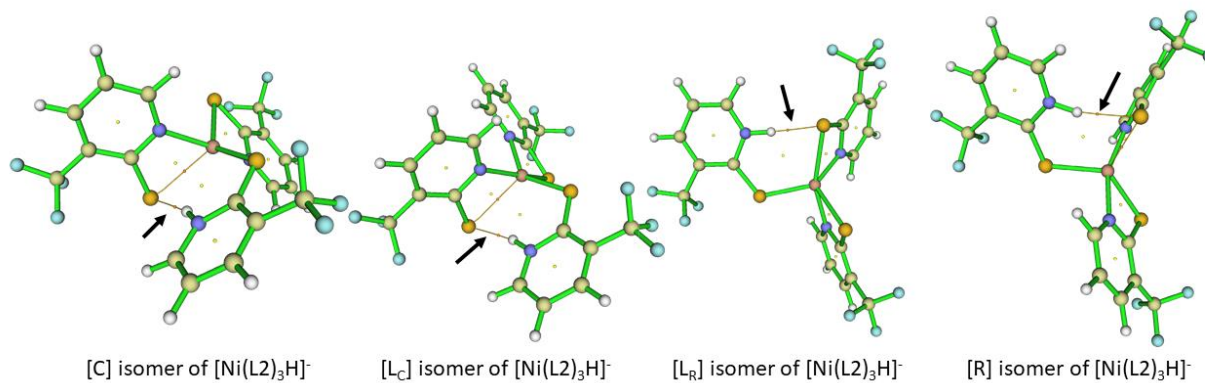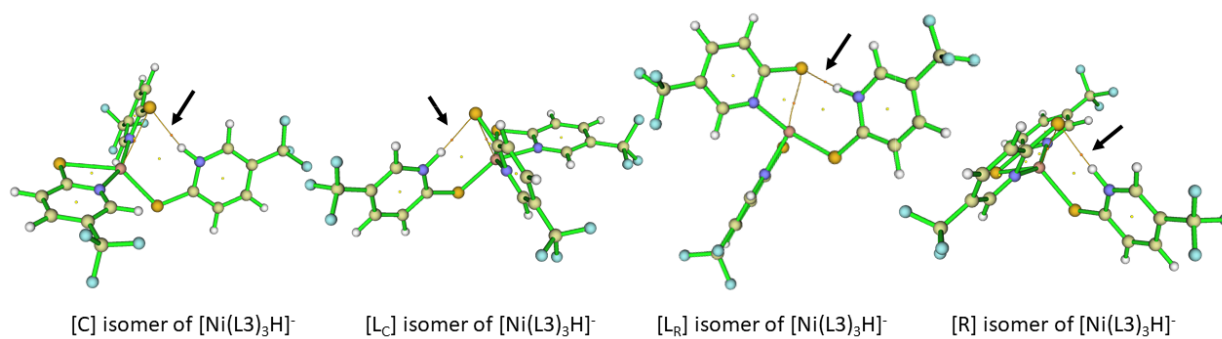



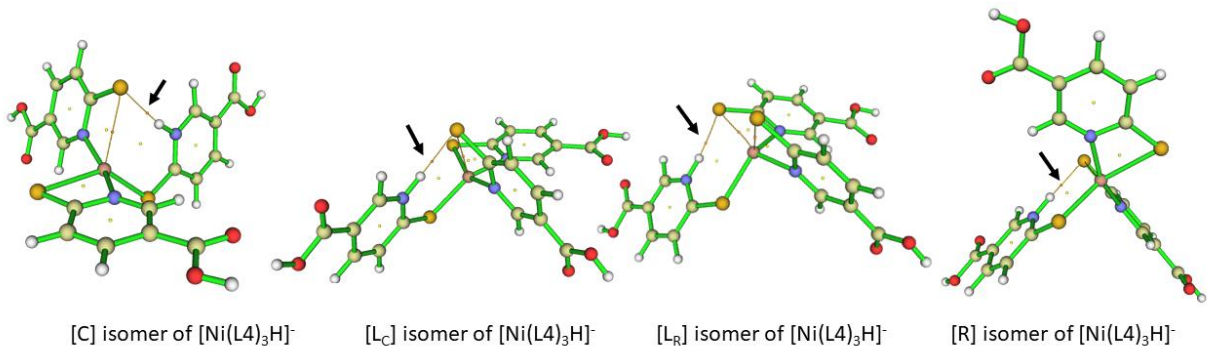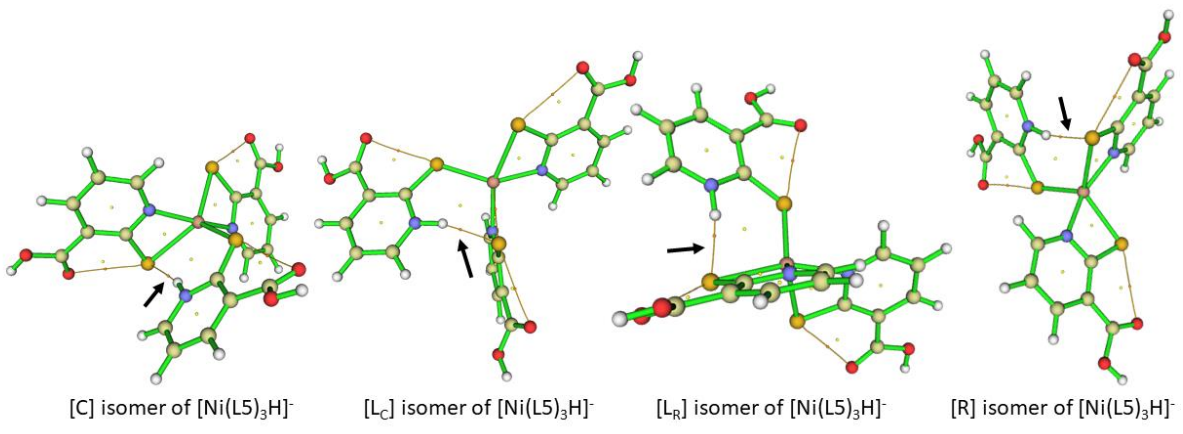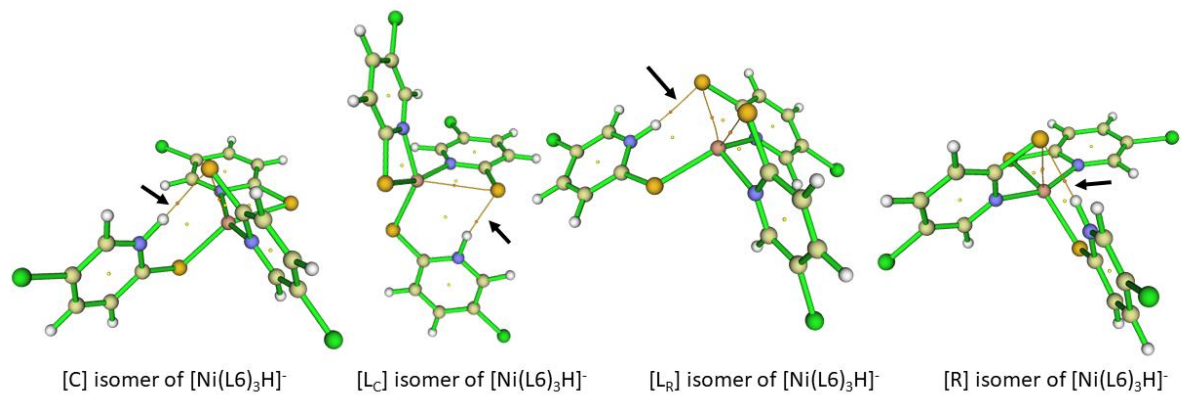

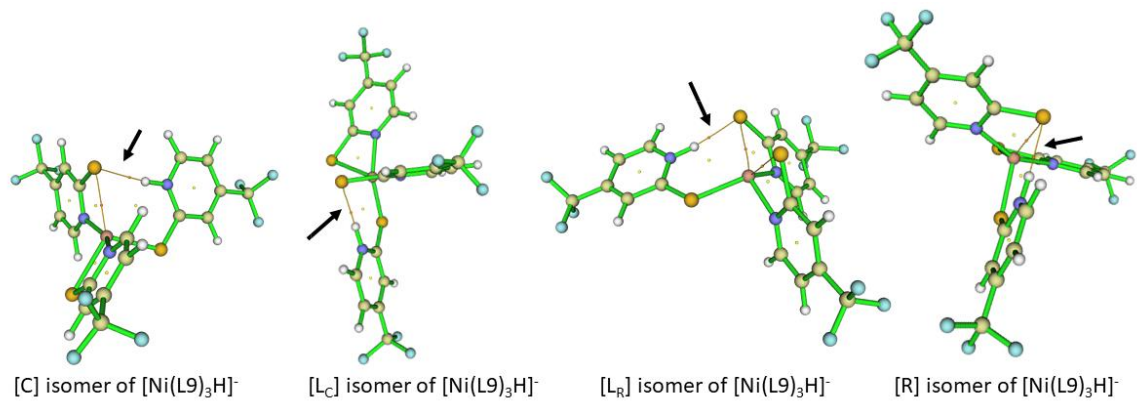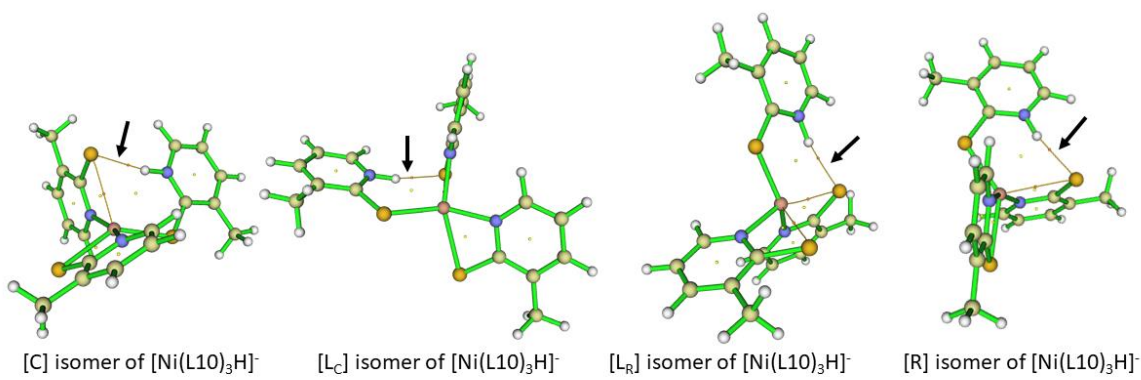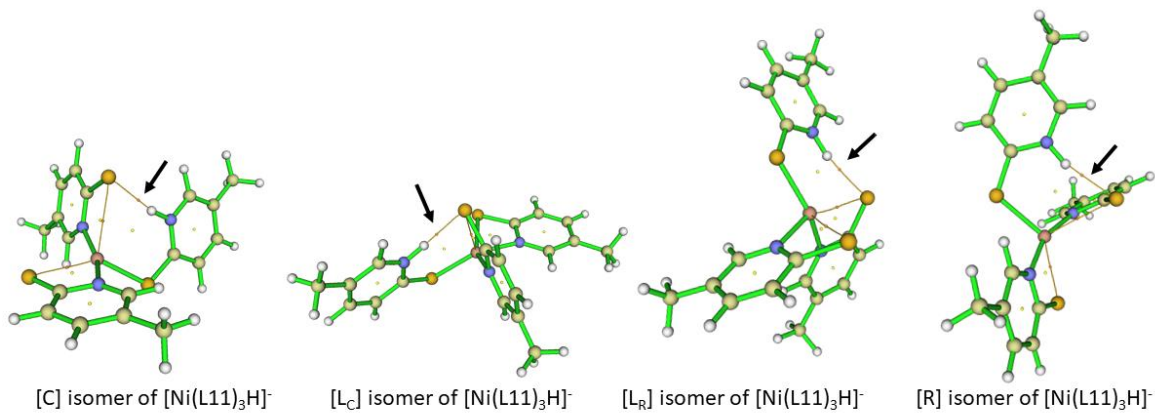

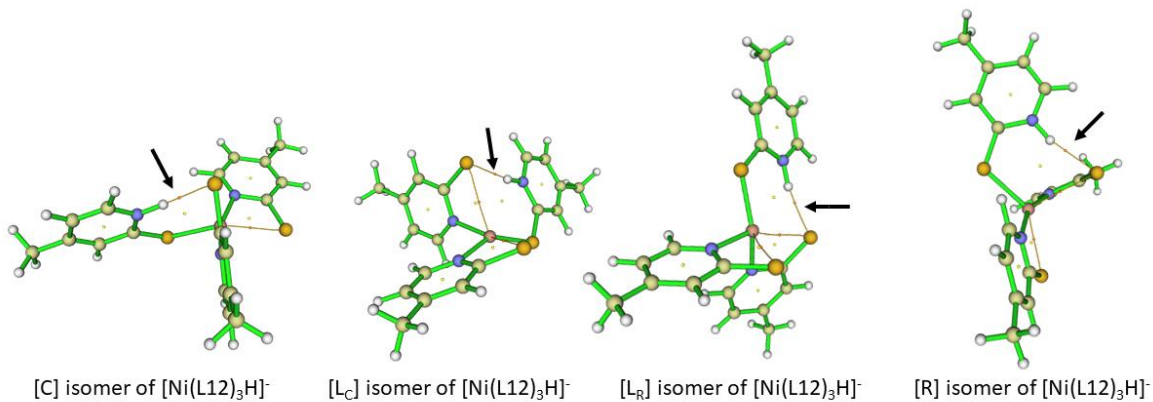

**Figure S2.** Topology maps of the computationally modeled reduced intermediates (**1-H**) represented using ball-stick drawing method. Blue, White, Light Yellow, Dark Yellow, Pink, Indigo, Red and Green balls represent N, H, C, S, Ni, F, O and Cl atoms respectively. Yellow lines are the bond paths. Black arrows point toward the intra-molecular hydrogen bonding interaction stabilizing the structure.

## References:

- 1 S. G. Rosenfield, H. P. Berends, L. Gelmini, D. W. Stephan and P. K. Mascharak, *Inorg. Chem.*, 1987, **26**, 2792–2797.
